**TITLE:**

**Single cell Iso-Sequencing enables rapid genome annotation for scRNAseq analysis**

**RUNNING TITLE:**

**Efficient genome annotation via single cell Iso-Seq**

**AUTHORS:**

Hope M. Healey<sup>1,#</sup>, Susan Bassham<sup>1</sup>, William A. Cresko<sup>1,2,#</sup>

<sup>1</sup> Institute of Ecology and Evolution, University of Oregon, Eugene, OR 97403

<sup>2</sup> Presidential Initiative in Data Science, University of Oregon, Eugene, OR 97403

**#Corresponding Authors**

Hope Healey, William A. Cresko

**ORCID IDs:**

S.B. 0000-0002-7309-2095

H.M.H. 0000-0001-9978-1553

W.A.C. 0000-0002-3496-8074

**AUTHOR CONTRIBUTIONS:**

- 1 H.M.H. and W.A.C. conceived of the project and planned the work. H.M.H. prepared the sample
- 2 for sequencing, performed the scRNAseq and ScISOr-Seq analysis, and took lead on writing the
- 3 manuscript. S.B. contributed to the analysis and made writing contributions. The work was
- 4 performed in the laboratory and under the direction of W.A.C. at the University of Oregon with
- 5 funding to W.A.C and H.M.H.

**Keywords:** PacBio, emerging model organisms, 10X Genomics

## ABSTRACT:

Single cell RNA sequencing (scRNAseq) is a powerful technique that continues to expand across various biological applications. However, incomplete 3' UTR annotations in less developed or non-model systems can impede single cell analysis resulting in genes that are partially or completely uncounted. Performing scRNAseq with incomplete 3' UTR annotations can impede the identification of cell identities and gene expression patterns and lead to erroneous biological inferences. We demonstrate that performing single cell isoform sequencing (ScISO-Seq) in tandem with scRNAseq can rapidly improve 3' UTR annotations. Using threespine stickleback fish (*Gasterosteus aculeatus*), we show that gene models resulting from a minimal embryonic ScISO-Seq dataset retained 26.1% greater scRNAseq reads than gene models from Ensembl alone. Furthermore, pooling our ScISO-Seq isoforms with a previously published adult bulk Iso-Seq dataset from stickleback, and merging the annotation with the Ensembl gene models, resulted in a marginal improvement (+0.8%) over the ScISO-Seq only dataset. In addition, isoforms identified by ScISO-Seq included thousands of new splicing variants. The improved gene models obtained using ScISO-Seq lead to successful identification of cell types and increased the reads identified of many genes in our scRNAseq stickleback dataset. Our work illuminates ScISO-Seq as a cost-effective and efficient mechanism to rapidly annotate genomes for scRNAseq.

## INTRODUCTION:

Single cell RNA sequencing (scRNAseq) is a revolutionary technique in biology that provides expression information from tissues and embryos (E. Shapiro, Biezuner, and

Linnarsson 2013). By barcoding RNA from individual cells directly from dissociated samples, scRNAseq allows for post hoc analysis of cell types and can be used to ascertain novel cell populations, explore developmental trajectories, and define gene regulatory networks (Luecken and Theis 2019).

To maximize the utility of scRNAseq datasets, however, 3' UTRs must be annotated for several reasons. ScRNAseq captures transcripts through poly(A) tails leading to a 3' bias in coverage (Hwang, Lee, and Bang 2018). Partially annotated genes may be represented in a dataset with lower read counts, leading to erroneous conclusions regarding their magnitude of expression across cell types. In addition, downstream scRNAseq analysis clusters cell types through the determination of a covariance structure across highly variable genes (Stuart et al. 2019). The systematic absence of such genes can lead to inferential errors in multivariate analyses and obscure biological reality.

The annotations of even intensively studied models, such as mice and zebrafish, continue to be improved (Gupta et al. 2018; Lawson et al. 2020). Most other organismal genomes are even less well annotated. To facilitate a broader utility of scRNAseq requires more efficient and methods for 3' UTR annotation. Recently, full length, single-molecule isoform sequencing (Iso-Seq) has been used to improve genome annotations (Ali, Thorgaard, and Salem 2021; Beiki et al. 2019; Kuo et al. 2017, 2020). PacBio's Iso-seq has been further adapted to use the 10x Genomics platform for scRNA barcoding (ScISOr-Seq) to track cell type specific isoform expression (Gupta et al. 2018; Zheng et al. 2020).

Here we show that ScISOr-Seq in the context of a scRNAseq experiment allows rapid 3'UTR annotation in threespine stickleback fish (*Gasterosteus aculeatus*). This fish has long

been a focus of study in behavior, ecology and evolution (Bell and Foster 1994; Colosimo et al. 2004; Cresko et al. 2004, 2007; Hohenlohe et al. 2010; Reid, Bell, and Veeramah 2021; M. D. Shapiro et al. 2004), and is now a nascent system for biomedical research (E A Beck et al. 2020; Emily A. Beck et al. 2021; Fuess et al. 2021; Gardell et al. 2017; Miller et al. 2007; Small et al. 2017). Although stickleback have a well assembled genome, it's 3' UTR annotations are incomplete which limits scRNAseq's utility. We demonstrate that a single PacBio SMRT cell of ScISOr-Seq data is sufficient to significantly improve the stickleback annotations to an extent on par with zebrafish for the purpose of scRNAseq analysis at this stage. Our findings demonstrate that ScISOr-Seq will be a useful tool to efficiently improve genome annotations for scRNAseq in many organisms.

## RESULTS AND DISCUSSION:

### ScISOr-Seq captured novel isoforms and improved 3'UTR

The ScISOr-Seq reads were classified with SQANTI3 (Tardaguila et al. 2018) using Ensembl gene models to describe isoforms based on how well they match splice variants (Figure 1A). The most common structural category (45.15% of isoforms) is "novel not in catalog" containing at least one new splicing site relative to the existing annotation (Figure 1A and 1B). While 17.42% of collapsed isoforms were "full splice matches" (FSM), only 16.7% of these isoforms matched the annotation. Therefore, roughly 3% of the unique isoforms matched the existing gene annotations, the rest improve existing or added gene models. Confirming that 3' UTRs were poorly annotated, 46.2% FSM had alternative 3' ends and 27.4% had alternative 3' and 5' ends (Figure 1C). Therefore, the existing stickleback annotation - in addition to having

70 incomplete 3' UTRs - is also missing many splice variants. Our work indicates that additional  
71 ScISOSeq or bulk Iso-Seq is necessary to capture these variants as well as prune erroneous  
72 transcript models from the Ensembl annotation.

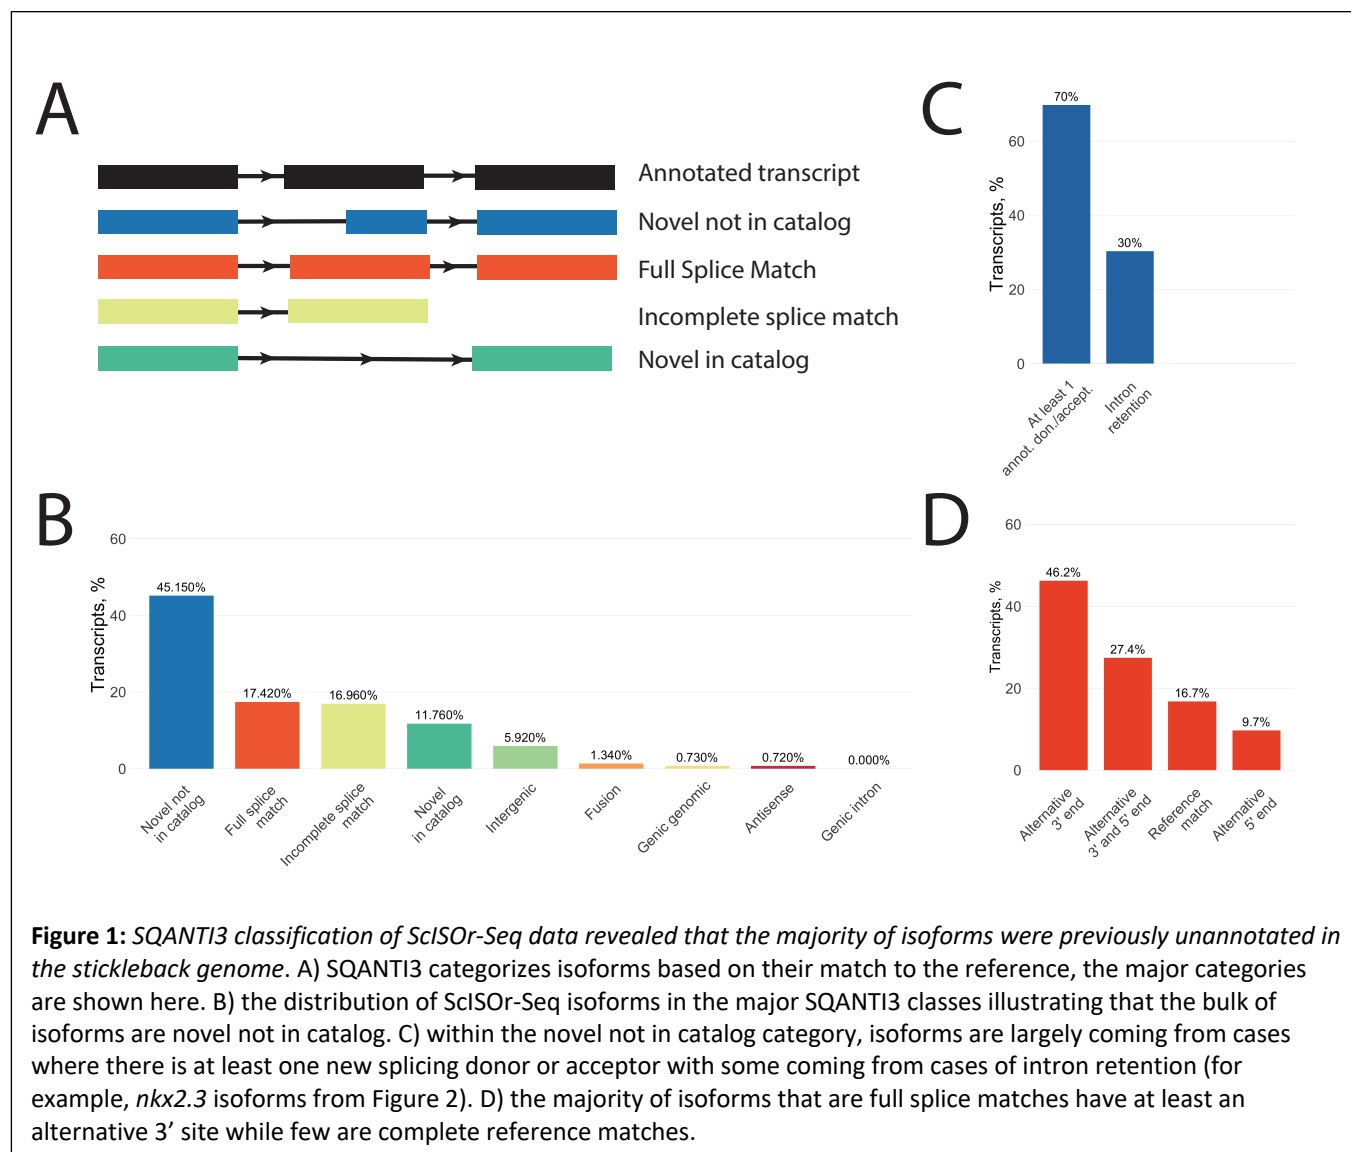

73

74 ScISOSeq improved the number of reads retained for scRNAseq

75 We initially tested how well the existing stickleback gene models from Ensembl

76 (BROAD S1, 104.1 database version) would capture scRNAseq reads. Strikingly, less than 50% of

reads were retained for downstream scRNAseq analysis (Figure 2B; Supplemental file 1). Using such an incomplete annotation for scRNAseq would likely result in erroneous interpretation of gene expression patterns for genes lacking 3' UTR annotations.

Next, we used ScISOr-sequencing data to generate new gene models and tested how well these new models would capture scRNAseq reads (Supplemental file 2). Using the ScISOr-Seq dataset, 13,028 previously annotated genes and 2,942 novel genes were identified (Figure 2A). The ScISOr-Seq annotations lead to a notable 26.1% increase in reads retained from scRNAseq compared to the Ensembl gene models alone (Figure 2B; Supplemental file 1). The alignment of scRNAseq reads with existing Ensembl and new ScISOr-Seq gene models

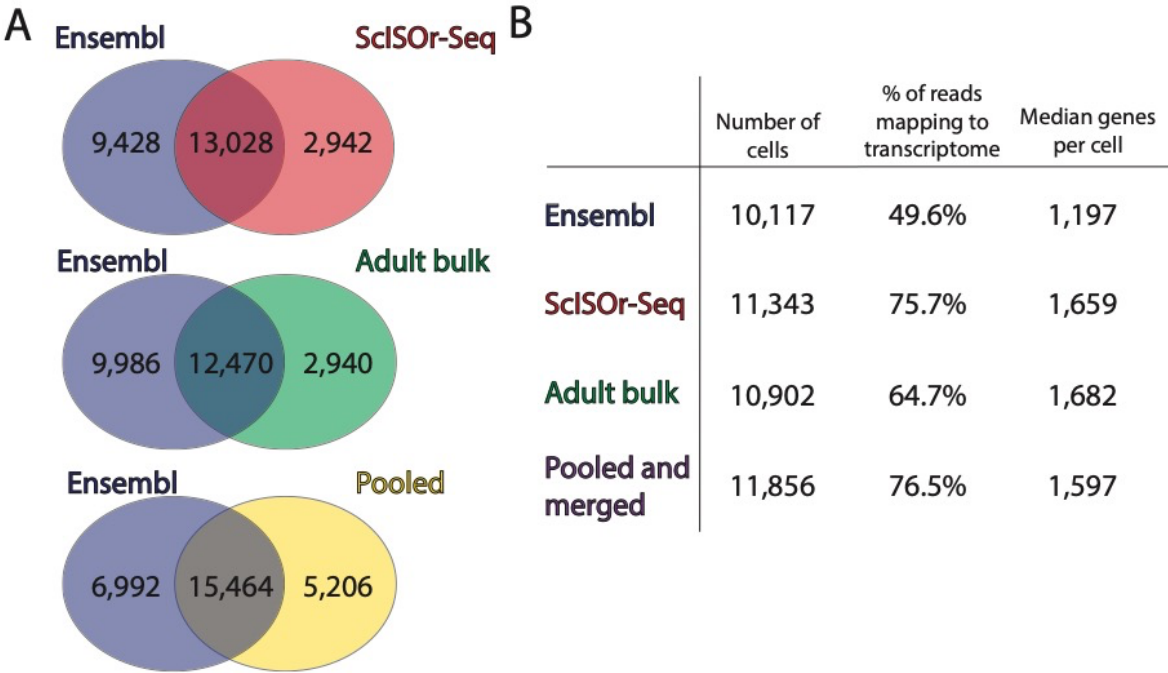

**Figure 2:** ScISOr-Seq and bulk Iso-Seq captured a limited number of annotated transcripts, but both resulted in an increase in reads mapping to the transcriptome. Ultimately, pooling this data and merging with the ensembl annotation resulted in the largest gains in reads mapped. A) the number of genes in common and unique to each Iso-Seq read category is compared to the ensembl genome. B) results from cell ranger runs using the different genome annotation files illustrating the overall improvements by using Iso-Seq data particularly the ScISOr-Seq gene models.

illustrates that ScISOr-Seq models retain greater numbers of reads due to improved annotation of 3' UTRs (Figure 3; Figure S1A and S1B). This result compares favorably with current research in the much better studied zebrafish model. Farnsworth, Saunders, and Miller (2020) completed their zebrafish atlas with 80% of reads retained in 5dpf (days post fertilization) fish. After Lawson et al. (2020) improved the zebrafish transcriptome, they noted a 4% increase in reads retained that lead to an increase of 2,257 cells and 8 clusters using the same 5 dpf atlas (Farnsworth, Saunders, and Miller 2020). The similarity in number of retained reads in our dataset with those published in zebrafish indicates that these improvements in stickleback are sufficient for scRNAseq.

Recently, Naftaly, Pau, and White (2021) published a large bulk analysis of adult stickleback Iso-Seq data from 16 PacBio SMRT cells, which we reanalyzed to create an annotation to test if comparably more scRNAseq reads are retained (Supplemental file 3). Although we identified similar overall annotated and novel genes, the bulk Iso-Seq annotation

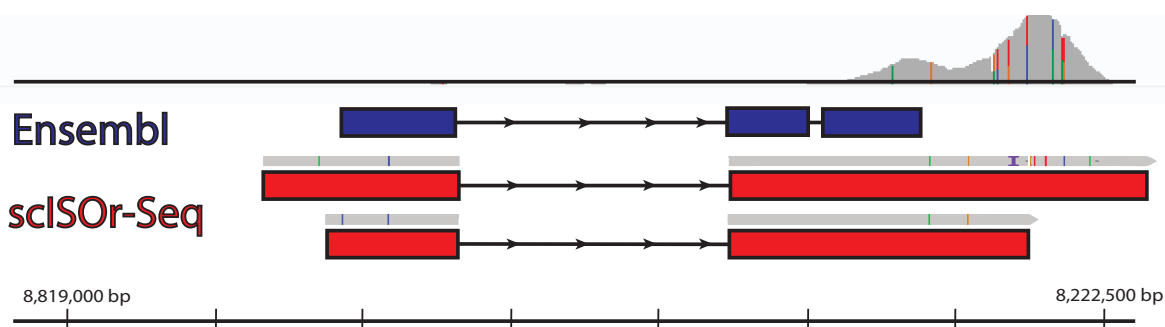

**Figure 3: ScISOr-Seq improved gene models by extending the 3' UTRs illustrated here by the two models for *nkx2.3*.** scRNAseq reads are shown at the top in grey. The existing ensembl model is shown in dark blue. Notably, this model does not overlap with the majority of the scRNAseq reads. The ScISOr-Seq reads (in grey) are shown above the respective gene models (in red) that they generated. Colored lines on the ScISOr-Seq and scRNAseq reads indicate a different base pair in the read than the stickleback reference genome (BROAD S1, 104.1 database version). These ScISOr-Seq gene models capture all of the scRNAseq reads.

from adult stickleback captured 11% fewer reads than our embryonic ScISOr-Seq annotation (Figure 2A and 2B; Supplemental file 1). These results are likely due to differential expression of transcripts between the adult and embryonic samples, highlight that even for species with previous Iso-Seq libraries additional sequencing may be needed for scRNAseq analysis in other developmental stages or tissue types.

Since both our ScISOr-Seq and the bulk Iso-Seq gtf files improved scRNAseq reads retained, Because of the improvements with ScISOr-Seq and bulk Iso-Seq we pooled them to create a comprehensive annotation and also merged this pooled dataset with the Ensembl annotations. We retained all transcripts and united them under a single gene model for scRNAseq analysis (Supplemental file 4). This new annotation contained 6,992 genes unique to Ensembl, 15,464 genes in both datasets, and 5,206 genes unique to the pooled dataset (Figure 2A). Although pooling and merging added 16 SMRT cells of Iso-Seq data as well as the full suite of Ensembl annotations, this effort only improved the proportion of reads retained by +0.8% beyond the annotation created by just our single ScISOr-Seq sample (Figure 2B; Supplemental file 1). Therefore, the gene models originating from ScISOr-Seq data alone could be used for scRNAseq analysis if a system lacks a prior annotation.

#### ScISOr-Seq enhances biological interpretation of cell clusters

Using the pooled (ScISOr-Seq and bulk Iso-Seq) annotation that was merged with Ensembl annotation, we proceeded with scRNAseq analysis (Supplemental file 5) to test whether biologically meaningful cell clusters would be created. We clustered cells by their transcriptional profiles into cell identities and analyzed the results with Seurat (Stuart et al.



2019). We identified 30 clusters of cells with 38 principal components (Figure 4A). We putatively annotated cell types via distinguishing sets of marker genes based on zebrafish literature (Farnsworth, Saunders, and Miller 2020; D. G. Howe et al. 2013; Wagner et al. 2018).

Although zebrafish and stickleback diverged ~ 229.9 m.y.a. (K. L. Howe et al. 2021), we identified similar cell types as observed in existing zebrafish atlases for similar developmental stages as we analyzed in stickleback (Farnsworth, Saunders, and Miller 2020; Wagner et al. 2018). Additionally, we compared the expression of *sox9a* and *sox9b* in our atlas to published descriptions of stickleback *in situ* expression at the same stage (Cresko et al. 2003). Supporting our cluster annotations, we observed expression of both SOX genes in roughly the same cell types as defined by *in situ* hybridization (Figure S2A and S2B; Cresko et al. 2003). Despite our success using a single SMRT cell for SciSO-Seq for isoform annotation, we would need to sequence additional SMRT cells to have enough data to correlate cell types and specific isoforms.

Since the pooled and merged dataset has higher numbers of cells, genes per cell, and total genes detected than the Ensembl scRNAseq dataset (Figure 2B), assessing the degree to which pooled and merged gene models improved the scRNAseq analysis is complex. For instance, a higher overall expression of a gene in a cluster might be the result of different clustering patterns, more cells retained, and/or more reads counted. We compared the raw counts of specific genes, number of cells expressing these genes, and number of clusters where at least 10% of cells expressed them (Figure 4B). Since Cell Ranger provided a subset of these values on a global scale (Figure 2B), we chose to examine changes in gene counts, cell number, and number of clusters with a case study: the *frizzled* genes, a family of Wnt-pathway signaling

molecules expressed in a wide range of tissues (Huang and Klein 2004; Wang et al. 2016). For all *frizzled* genes, we observed increases in raw counts and number of cells expressing them (Figure 4B). Some genes, however, exhibited dramatic increases (*fzd1*, *fzd4*, *fzd2*, and *fzd8b*) while others exhibited minor increases (*fzd9b* and *fzd10*). Comparing the gene models of *fzd1*

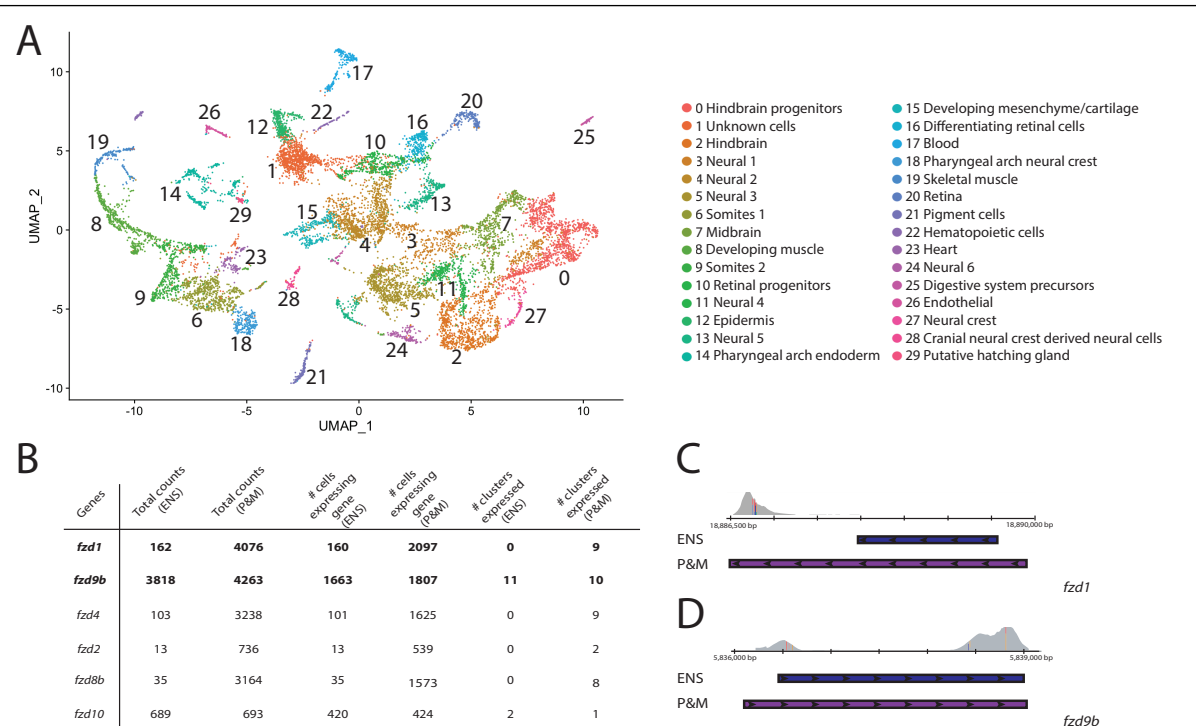

**Figure 4:** Using the updated gene models from our merged and pooled dataset, we identified expected cell types in 70hpf stickleback scRNAseq data and illustrated how annotations improvements are relevant for analysis. A) the clustering and cell identities of the scRNAseq data is illustrated on the UMAP. B) frizzled gene family expression compared between the ensembl annotation scRNAseq analysis and the pooled and merged analysis using total raw counts, number of cells expressing each gene, and the number of clusters where over 10% of cells are expressing each gene. C) *fzd1* gene model is greatly extended in the pooled and merged annotation (purple) compared to the ensembl model (blue) which allows for much greater counting of reads (grey). D) *fzd9b* had minor changes in the pooled and merged model (purple), a longer 5' UTR, in comparison with the ensembl annotation (blue) which led to minimal increases in reads (grey) counted. The scRNAseq read pileups in C and D have colored lines on base pairs that are different from the stickleback reference genome (BROAD S1, 104.1 database version).

and *fzd9b*, we determined which factors influenced expression detection. Importantly, *fzd1*'s 5' and 3' UTR expanded in the merged and pooled annotation, however only the 5' end of *fzd9b* was extended (Figure 4C and 4D). Based on the read alignments (Figure 4C and 4D), *fzd1*'s increase in counted reads is solely due to the 3' UTR changes, while *fzd9b*'s slight increase is

due to the 5' end extension. Cluster numbers also varied within the group. While *fzd1*, *fzd4*, *fzd2*, and *fzd8b*'s were expressed in more clusters, *fzd9b* and *fzd10* were in one less cell class in the merged and pooled dataset than the Ensembl dataset. We hypothesize that two clusters (containing *fzd9b* and *fzd10*) were combined in the merged and pooled dataset relative to Ensembl. Overall, this gene family comparison illustrates the problem of using an annotation with missing 3'UTRs. If the Ensembl dataset's *fzd* counts were accepted as their true qualitative and quantitative expression, flawed conclusions would have been made regarding the contributions of each gene in the family.

# **SUMMARY:**

Incomplete 3'UTR annotations can hinder single cell transcriptional profiling studies. In addition to reducing the overall number of genes included in an analysis, systematic differences in preliminary UTR annotations could lead to significant inferential errors. We illustrated in stickleback fish that a minimal ScISOSeq dataset, generated concurrently with scRNAseq data, was capable of dramatic improvements in retained read counts (+26.1%). Additionally, we showed that pooling reads from adult bulk Iso-Seq and merging with the existing Ensembl annotations improved reads retained negligibly beyond the models solely resulting from embryonic ScISOSeq (+0.8%) suggesting developmental stage of specimens is an important factor when improving annotations. Using the improved annotation for scRNAseq permitted identification of cell types and increased the observed expression of numerous genes. Overall, our work illustrates that ScISOSeq is a rapid and cost-effective method to annotate genomes of various organisms for scRNAseq and can improve efficacy of biological inferences.

174

## 175 **METHODS:**

### 176 Tissue Dissociation to Generate a Pool of Single Cells

177           We crossed a laboratory line of stickleback originally isolated from Cushman Slough  
178 (Oregon) and raised embryos to 70 hours post fertilization (hpf) at 20°C using standard  
179 procedures from the Cresko Laboratory Stickleback Facility (Cresko et al. 2004). We euthanized  
180 36 embryos in MS-222 following IACUC approved procedures then dechorionated and deyolked  
181 them at room temperature. We limited our embryo dissection to 20 minutes based on Farrell et  
182 al. (2018). Following protocols from Bresciani, Broadbridge, and Liu (2018), we dissociated the  
183 cells for 6 minutes in 0.25% trypsin in PBS at 30°C, pipetting up and down every 30 seconds,  
184 then, stopped the dissociation using 10% FBS DMEM and spun down cells at 400xG for 3min at  
185 4°C. We resuspended cells in 1mL of 0.1% BSA PBS, centrifuged at 400xG for 3min at 4°C, and  
186 resuspended in 100ul 0.04% BSA in PBS. At room temperature, we filtered cells through a 40uM  
187 cell strainer (Thomas scientific 1181X52) then washed the original tube twice with 100ul of  
188 0.04% BSA in PBS and poured over the same cell strainer.

189

### 190 Library Preparation

191           The scRNAseq and ScISOr-Seq samples were prepared and sequenced by the University  
192 of Oregon Genomics and Cell Characterization core facility (<https://gc3f.uoregon.edu>). Samples  
193 were diluted to 800 cells/ul using 0.04% BSA in PBS to target 10,000 cells for the 10X Genomics  
194 Single Cell 3' Genome Expression (GEX) mRNA-Seq prep with v3.1 NextGem chemistry. The  
195 scRNAseq samples were then sequenced on 1/7<sup>th</sup> of a single S4 lane on a NovaSeq 6000

platform (Illumina). For the ScISOr-Seq library, 400ng of the amplified single cell cDNA as input for the SMRTbell Express Template Prep Kit 2.0 (P/N 100-938-900) without reamplification. Sample specific barcode (ATATAGCGCGCGTGTG) were added using the Barcoded Adapter Kit 8B—OVERHANG (P/N 101-628-500). The ScISOr-Seq library was sequenced on a single SMRT Cell 8M on the PacBio Sequel II platform using the v4 primer, v2.1 polymerase, 1 hour binding, 30-hour movie, and 2-hour pre-extension time at a loading concentration of 100pM.

## PacBio Data Processing

The University of Oregon Genomics and Cell Characterization core facility (<https://gc3f.uoregon.edu>) generated “circular consensus” reads for our ScISOr-Seq dataset (ccs -j 39 --min-passes 3 --min-snr 2.5 --min-length 10 --max-length 50000 --min-rq 0.99; v6.6.0) and used lima (-j 39 -isoseq; v2.2.0) to remove a sample specific barcode (ATATAGCGCGCGTGTG) as a part of the PacBio SMRT Analysis software (Supplemental file 6). After barcode clipping, we used a custom ScISOr-Seq processing script (scISOr\_Seq\_processing.py) that removed the sample primers (3p: CTACACGACGCTCTTCCGATCT; 5p: CCCATGTACTCTGCGTTGATACCACTGCTT), removed and saved cell and UMI barcodes, removed poly(A) tails, then filtered out duplicated reads. This script outputs reads that had the expected presence and orientation of primers and polyA tails for downstream analysis. The script additionally outputs reads without the expected primers in a separate file; however, these other reads were not used for further analysis.

We aligned reads to the stickleback genome (BROAD S1, 104.1 database version) using minimap2 (v2.7; parameters: -ax splice, -uf, -O6,24, -B4; Li 2018) . We clustered for unique transcripts with collapse\_isoforms\_by\_sam.py script (c=.99, i=.95; Tseng 2021) from cDNA

Cupcake (v27.0.0), classified transcripts with the sqanti3\_qc.py script from SQANTI3 (v4.2), and refined transcripts with sqanti3\_RulesFilter.py script (Tardaguila et al. 2018). We used the sqanti\_classification.filtered\_lite.gtf that resulted from the refining step (Supplemental file 2) to run Cell Ranger from 10x Genomics (v3.2.0) as described below.

We downloaded the raw data from Naftaly, Pau, and White (2021) from NCBI. This adult Iso-Seq dataset contains gonad, pronephros, brain, and liver reads from both sexes, a total of 16 SMRT cells. We processed reads from this dataset with the following steps: we generated circular consensus reads with ccs (--min-rq=.9; v6.0.0), clipped barcodes listed in Naftaly, Pau, and White (2021) with lima (--isoseq --dump-clips; v2.2.0), removed polyA tails with isoseq3 refine (--require-polyA; v3.4.0-0), and clustered reads with isoseq3 cluster (v3.4.0-0) from the PacBio SMRT Analysis software (Supplemental file 6). For the analysis with solely this data, we aligned reads to the stickleback genome (BROAD S1, 104.1 database version), collapsed transcripts with cDNA Cupcake (v28.0.0), and filtered and classified with SQANTI3 (v4.2) as done with the ScISO-Seq data. Again, we used the sqanti\_classification.filtered\_lite.gtf from SQANTI3 (Supplemental file 3) to run Cell Ranger as described below. Due to reduced novel and increased annotated genes relative to Naftaly, Pau, and White (2021), we additionally tried using minimap2-2.15 with -ax splice -uf -C5 -secondary=no to match their parameters; however, we observed negligible changes. We propose that differences in our analyses arise from different earlier processing steps, different versions of stickleback gene models, and an updated version of SQANTI.

We pooled both sets of Iso-Seq reads and merged it with existing Ensembl annotations to create an improved version of the Ensembl annotations. Previously, we created a modified

version of the Ensembl annotations where we extended the 3' UTRs (Supplemental files 7,8) for several marker genes (*tbx16*, *sox10*, *sox32*, and *eya1*) and fgf/fgfr genes (*fgfr1a*, *fgfr1b*, *fgfr1a*, *FGFRL1*, *fgfr2*, *fgfr3*, *fgfr4*, *fgf3*, *fgf4*, *fgf16*, *fgf17*, *fgf6*, *fgf6a*, *fgf8a*, and *fgf8b*). Because we lacked ScISO-Seq reads for *fgf4*, we used this modified gtf for the merging (Supplemental file 8). We completed the processing of the ScISO-Seq and bulk Iso-Seq data separately as described above then combined the files prior to alignment. We aligned the combined files with minimap2, collapsed transcripts with cDNA cupcake, and refined and classified isoforms with SQANTI3 as explained above.

We merged the sqanti\_classification.filtered\_lite.gtf resulting from SQANTI3 with the Ensembl annotation using TAMA (Kuo et al. 2020). To prepare the gtf files for TAMA Merge, we converted them to bed files using bedparse gtf2bed (--extraFields gene\_id). Then, modified the output with awk to rearrange the columns of the bed file such that the gene id was separated from the transcript id by a semicolon (awk -v OFS='\t' '{print \$1,\$2,\$3, \$13 ";" \$4, \$5, \$6,\$7,\$8,\$9,\$10,\$11,\$12}'). We merged with TAMA's script tama\_merge.py (-s ensembl -cds ensembl -d merge\_dup). We applied the ensembl gene names to genes with corresponding IDs using a custom script (tama\_associating\_ensembl\_ids\_with\_genes.py). For our final gtf file, we converted the output bed file back to a gtf with TAMA's tama\_convert\_bed\_gtf\_ensembl\_no\_cds.py (Supplemental file 4). We also generated a gtf file specifically for scRNAseq analysis where mitochondrial genes started with "MT" by transforming the bed file with a custom script (tama\_associating\_ensembl\_ids\_with\_genes\_for\_scRNAseq.py) and then converting the output back to a gtf in the same fashion as above (Supplemental file 5).

## scRNAseq analysis

We quantified gene counts using 10x Genomics Cell Ranger v3.0.2 (Supplemental file 1). We generated a reference using mkgtf and mkref, retaining protein coding and non-protein coding genes, and then aligned and counted reads using the stickleback genome (BROAD S1, 104.1). We analyzed the counts using the Seurat package (v3.2.3; Stuart et al. 2019) on R (v4.0.2). We retained all cells for the analysis. We normalized the counts using SCTransform and regressed out the mitochondrial genes using the glmGamPoi method (Hafemeister and Satija 2019). Based on the inflection point in the elbow plot of the PCA results, we chose 38 dimensions for generating the UMAP and identifying clusters. We identified cluster identities using three marker gene approaches.

First, we searched for marker genes identified in Farnsworth *et al.* (2020) for specific cell types found in a similar developmental stage from zebrafish (24hpf in zebrafish). Next, we identified markers with Seurat's FindAllMarkers searching for genes that were positively upregulated in each cluster compared to the other identities, in a minimum of 25% of cells, and a log fold change threshold of 0.25. Finally, we identified markers with Seurat's FindMarkers searching for genes that were positively upregulated in each cluster versus all the other cells. For the second and third approaches, we searched for the homologous gene in zebrafish and used expression data from zfin to predict which cell types expressed the gene. To quantify *frizzled* gene counts, we used FetchData to isolate raw counts for each gene (*fzd1*, *fzd4*, *fzd2*, *fzd8b*, *fzd9b*, and *fzd10*) and the number of cells expressing the gene. To determine the number of cell clusters each *frizzled* gene was expressed in, we saved a dotplot, subsetted for clusters



where the percent of cells expressing the gene was greater than 10%, and then counted the number of clusters left for each gene.

## **Acknowledgments**

We are grateful for M. Weitzman, D. Turnbull, and J. Sydes from the UO GC3F for assistance with library preparation, sequencing, and initial ScISOr-Seq data processing (ccs and lima). We especially thank C. Small for insightful comments on the analysis, M. Currey for maintaining the stickleback colony, and E.A. Beck for perceptive remarks on the manuscript. We also thank J. Searcy for assisting us at downloading Naftaly, Pau, and White (2021)'s raw data from google cloud server. This work was funded by a PacBio local SMRT grant (ScISOr-Seq library preparation and sequencing), This work was funded by National Science Foundation grant OPP-2015301 and Oregon Research Excellence Funds (to WAC). HMM was supported by the Genetics Training Program (NIH T32GM007413) at UO.

## **Data Accessibility**

All raw sequencing data associated with this study will be available upon peer-reviewed publication via the NCBI Sequencing Read Archive (SRA), under BioProject PRJXXXXXXX. Assembly, annotation, and summary files not in the Supplementary Information will be available upon peer-reviewed publication in the Dryad repository under Accession XXXXXXXX. All scripts can be found in the github repository ([https://github.com/hopehealey/scISOseq\\_processing](https://github.com/hopehealey/scISOseq_processing)).

# Supplemental Figures:

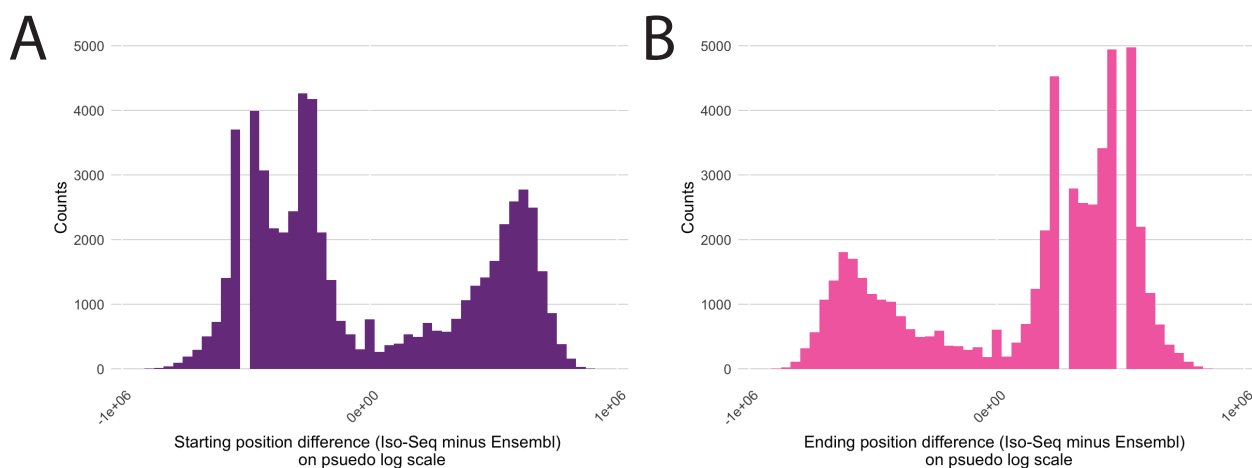

**Figure supplement 1:** By comparing the median difference in starting or ending position between the ensemble annotations and pooled Iso-seq annotations, it shows that bulk Iso-Seq and ScISOr-Seq reads overall lead to earlier starting positions (median=-62, A) and extended ending positions (median=62, B). We plotted this on a pseudo log scale to account for the negative values.

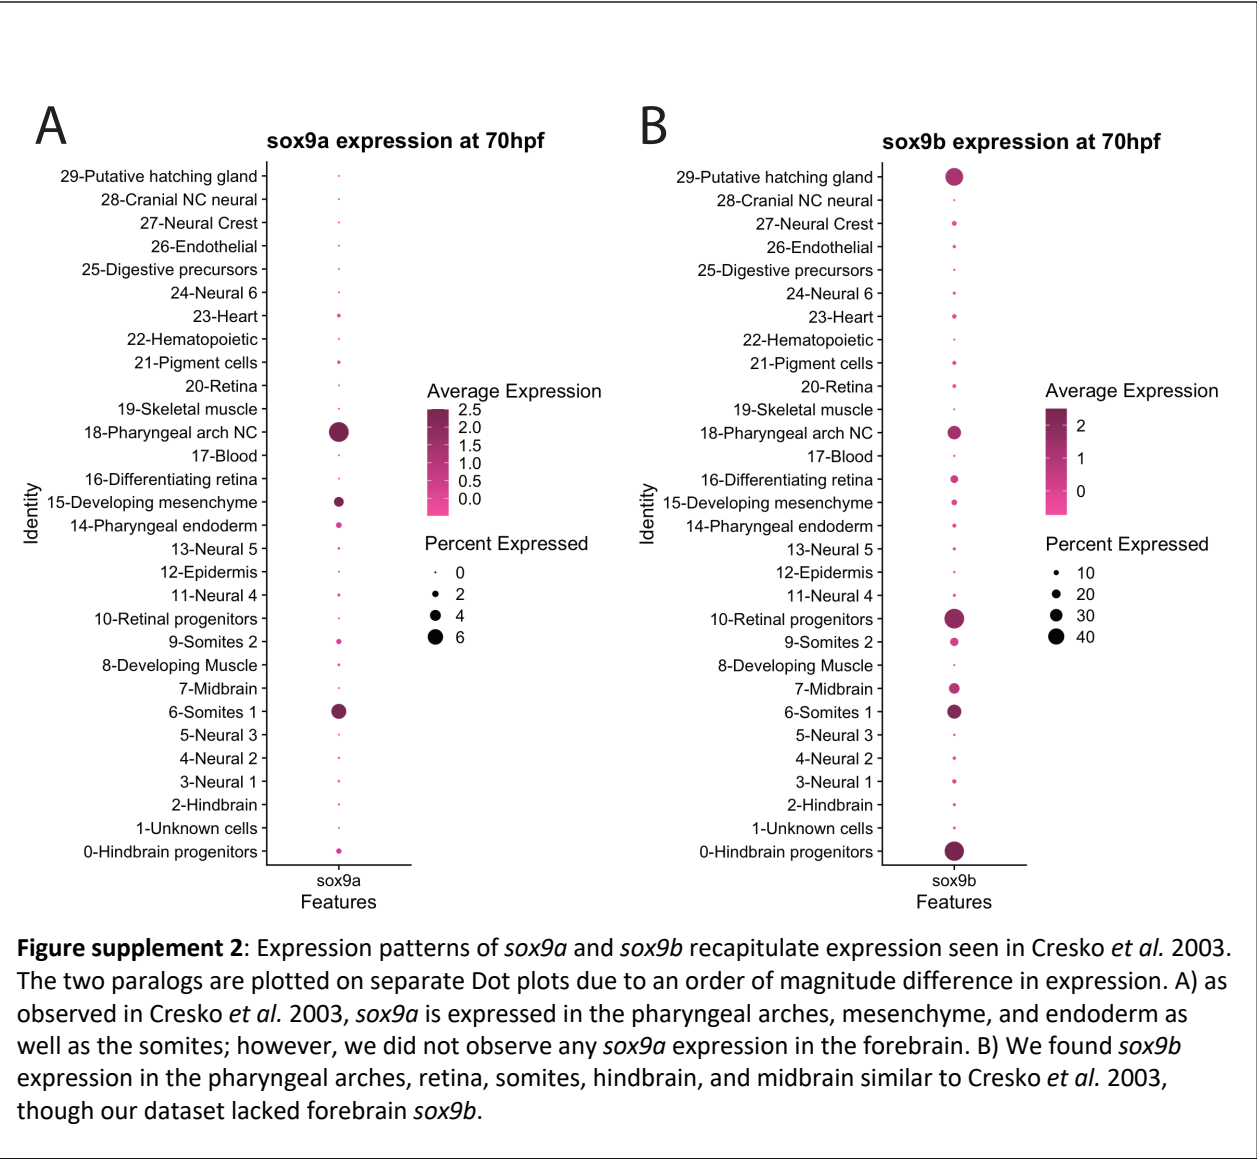

## 317 Supplementary file captions

318

319 **Supplementalfile1\_CellRangerOutputInformation.xlsx:** A table containing detailed Cell Ranger  
320 results for each annotation that was used.

321 **Supplementalfile2\_Annotation1\_scISOrSeq.gtf:** The genome annotations that originated from  
322 the scISOrSeq sequencing reads and was produced from SQANTI3.

323 **Supplementalfile3\_Annotation2\_Bulk\_Iso\_Seq.gtf:** The genome annotations that originated  
324 from the bulk Iso-Seq sequencing reads from Naftaly et al. (2021) and was produced from  
325 SQANTI3.

326 **Supplementalfile4\_Annotation3\_Pooled\_Iso\_Seqs\_merged\_with\_ensembl.gtf:** The genome  
327 annotations from ensembl (BROAD S1, 104.1) merged with the gtf file produced by SQANTI3's  
328 file that originated from the bulk Iso-Seq and scISOrSeq data.

329 **Supplementalfile5\_Annotation4\_Pooled\_Iso\_Seqs\_merged\_with\_ensembl\_for\_cellranger.gtf:**  
330 The genome annotations from ensembl (BROAD S1, 104.1) merged with the gtf file produced by  
331 SQANTI3's file that originated from the bulk Iso-Seq and scISOrSeq data. The file is the same as  
332 the annotation 4 file with the exception of mitochondrial genes which have gene names that  
333 start with MT.

334 **Supplementalfile6\_IsoSeq\_Processing\_Data.xlsx:** The processing information (reads retained  
335 and lost at each step) for the Bulk Iso-seq and ScISOr-Seq datasets.

336 **Supplementalfile7\_EnsemblModified\_manual\_changes.xlsx:** The 3' UTR modifications made to  
337 the ensembl genome for select marker genes and *fgf/fgfr* genes.

338 **Supplementalfile8\_Annotation5\_ensembl\_modified.gtf:** The genome annotations from  
339 ensembl (BROAD S1, 104.1) with 3' UTRs extended in select marker genes and *fgf/fgfr* genes as  
340 described in **EnsemblModified\_manual\_changes.xlsx**.

341

# References

- Ali, Ali, Gary H. Thorgaard, and Mohamed Salem. 2021. "PacBio Iso-Seq Improves the Rainbow Trout Genome Annotation and Identifies Alternative Splicing Associated With Economically Important Phenotypes." *Frontiers in Genetics* 12. /pmc/articles/PMC8321248/ (September 15, 2021).
- Beck, E A, M C Currey, C M Small, and W A Cresko. 2020. "QTL Mapping of Intestinal Neutrophil Variation in Threespine Stickleback Reveals Possible Gene Targets Connecting Intestinal Inflammation and Systemic Health." *G3 (Bethesda)* 10(2): 613–22. <https://www.ncbi.nlm.nih.gov/pubmed/31843804>.
- Beck, Emily A. et al. 2021. "Advancing Human Disease Research with Fish Evolutionary Mutant Models." *Trends in Genetics*.
- Beiki, H. et al. 2019. "Improved Annotation of the Domestic Pig Genome through Integration of Iso-Seq and RNA-Seq Data." *BMC Genomics* 20(1): 1–19. <https://link.springer.com/articles/10.1186/s12864-019-5709-y> (January 1, 2021).
- Bell, M. A., and S A Foster. 1994. *The Evolutionary Biology of the Threespine*. 1st ed. New York: Oxford University Press.
- Bresciani, Erica, Elizabeth Broadbridge, and Paul P. Liu. 2018. "An Efficient Dissociation Protocol for Generation of Single Cell Suspension from Zebrafish Embryos and Larvae." *MethodsX* 5: 1287. /pmc/articles/PMC6197777/ (September 20, 2021).
- Colosimo, Pamela, Brian Summers, David Kingsley, and Kim Hosemann. 2004. "A Simple and Efficient Microinjection Protocol for Making Transgenic Sticklebacks." *Behaviour* 141(11–12): 1345–55.
- Cresko, William A. et al. 2003. "Genome Duplication, Subfunction Partitioning, and Lineage Divergence: Sox9 in Stickleback and Zebrafish." *Developmental Dynamics* 228(3): 480–89.
- . 2004. "Parallel Genetic Basis for Repeated Evolution of Armor Loss in Alaskan Threespine Stickleback Populations." *Proceedings of the National Academy of Sciences of the United States of America* 101(16): 6050–55. [www.pnas.org/cgi/doi/10.1073/pnas.0308479101](http://www.pnas.org/cgi/doi/10.1073/pnas.0308479101) (January 4, 2021).
- Cresko, William A., Katrina L. McGuigan, Patrick C. Phillips, and John H. Postlethwait. 2007. "Studies of Threespine Stickleback Developmental Evolution: Progress and Promise." *Genetica* 129(1): 105–26.
- Farnsworth, Dylan R., Lauren M. Saunders, and Adam C. Miller. 2020. "A Single-Cell Transcriptome Atlas for Zebrafish Development." *Developmental Biology* 459(2): 100–108. <https://doi.org/10.1016/j.ydbio.2019.11.008>.
- Farrell, Jeffrey A. et al. 2018. "Single-Cell Reconstruction of Developmental Trajectories during Zebrafish Embryogenesis." *Science* 360(6392).
- Fuess, L E et al. 2021. "Immune Gene Expression Covaries with Gut Microbiome Composition in Stickleback." *MBio* 12(3). <https://www.ncbi.nlm.nih.gov/pubmed/33947750>.
- Gardell, A M et al. 2017. "Exogenous Iodide Ameliorates Perchlorate-Induced Thyroid Phenotypes in Threespine Stickleback." *Gen Comp Endocrinol* 243: 60–69. <https://www.ncbi.nlm.nih.gov/pubmed/27815158>.
- Gupta, Ishaan et al. 2018. "Single-Cell Isoform RNA Sequencing Characterizes Isoforms in Thousands of Cerebellar Cells." *Nature Biotechnology* 2018 36:12 36(12): 1197–1202.

- 385 <https://www.nature.com/articles/nbt.4259> (September 15, 2021).
- 386 Hafemeister, Christoph, and Rahul Satija. 2019. "Normalization and Variance Stabilization of  
387 Single-Cell RNA-Seq Data Using Regularized Negative Binomial Regression." *Genome*  
388 *Biology* 20(1): 296. [https://genomebiology.biomedcentral.com/articles/10.1186/s13059-](https://genomebiology.biomedcentral.com/articles/10.1186/s13059-019-1874-1)  
389 [019-1874-1](https://genomebiology.biomedcentral.com/articles/10.1186/s13059-019-1874-1) (March 26, 2021).
- 390 Hohenlohe, Paul A. et al. 2010. "Population Genomics of Parallel Adaptation in Threespine  
391 Stickleback Using Sequenced RAD Tags." *PLoS Genetics* 6(2).
- 392 Howe, Douglas G. et al. 2013. "ZFIN, the Zebrafish Model Organism Database: Increased  
393 Support for Mutants and Transgenics." *Nucleic Acids Research* 41(D1): D854–60.  
394 <https://academic.oup.com/nar/article/41/D1/D854/1074339> (September 15, 2021).
- 395 Howe, Kevin L et al. 2021. "Ensembl 2021." *Nucleic Acids Research* 49(D1): D884–91.  
396 <https://academic.oup.com/nar/article/49/D1/D884/5952199> (September 15, 2021).
- 397 Huang, Hui-Chuan, and Peter S Klein. 2004. "The Frizzled Family: Receptors for Multiple Signal  
398 Transduction Pathways." *Genome Biology* 2004 5:7 5(7): 1–7.  
399 <https://genomebiology.biomedcentral.com/articles/10.1186/gb-2004-5-7-234> (September  
400 15, 2021).
- 401 Hwang, Byungjin, Ji Hyun Lee, and Duhee Bang. 2018. "Single-Cell RNA Sequencing  
402 Technologies and Bioinformatics Pipelines." *Experimental and Molecular Medicine* 50(8).  
403 <http://dx.doi.org/10.1038/s12276-018-0071-8>.
- 404 Kuo, Richard I. et al. 2017. "Normalized Long Read RNA Sequencing in Chicken Reveals  
405 Transcriptome Complexity Similar to Human." *BMC Genomics* 2017 18:1 18(1): 1–19.  
406 <https://bmcbgenomics.biomedcentral.com/articles/10.1186/s12864-017-3691-9>  
407 (September 15, 2021).
- 408 ———. 2020. "Illuminating the Dark Side of the Human Transcriptome with Long Read  
409 Transcript Sequencing." *BMC Genomics* 2020 21:1 21(1): 1–22.  
410 <https://bmcbgenomics.biomedcentral.com/articles/10.1186/s12864-020-07123-7>  
411 (September 15, 2021).
- 412 Lawson, Nathan D. et al. 2020. "An Improved Zebrafish Transcriptome Annotation for Sensitive  
413 and Comprehensive Detection of Cell Type-Specific Genes." *eLife* 9: 1–76.
- 414 Li, Heng. 2018. "Minimap2: Pairwise Alignment for Nucleotide Sequences." *Bioinformatics*  
415 34(18): 3094–3100.  
416 <https://academic.oup.com/bioinformatics/article/34/18/3094/4994778> (September 15,  
417 2021).
- 418 Luecken, Malte D, and Fabian J Theis. 2019. "Current Best Practices in Single-cell RNA-seq  
419 Analysis: A Tutorial." *Molecular Systems Biology* 15(6).
- 420 Miller, C T et al. 2007. "Cis-Regulatory Changes in Kit Ligand Expression and Parallel Evolution of  
421 Pigmentation in Sticklebacks and Humans." *Cell* 131(6): 1179–89.  
422 <https://www.ncbi.nlm.nih.gov/pubmed/18083106>.
- 423 Naftaly, Alice Shanfelter, Shana Pau, and Michael A White. 2021. "Long-Read RNA Sequencing  
424 Reveals Widespread Sex-Specific Alternative Splicing in Threespine Stickleback Fish."  
425 *Genome Research* 31(8): 1486–97.  
426 <https://genome.cshlp.org/content/early/2021/06/15/gr.274282.120> (September 15,  
427 2021).
- 428 Reid, K, M A Bell, and K R Veeramah. 2021. "Threespine Stickleback: A Model System For

Evolutionary Genomics." *Annu Rev Genomics Hum Genet* 22: 357–83.  
<https://www.ncbi.nlm.nih.gov/pubmed/33909459>.  
Shapiro, Ehud, Tamir Biezuner, and Sten Linnarsson. 2013. "Single-Cell Sequencing-Based Technologies Will Revolutionize Whole-Organism Science." *Nature Reviews Genetics* 2013 14:9 14(9): 618–30. <https://www.nature.com/articles/nrg3542> (September 23, 2021).  
Shapiro, M D et al. 2004. "Genetic and Developmental Basis of Evolutionary Pelvic Reduction in Threespine Sticklebacks." *Nature* 428(6984): 717–23.  
<https://www.ncbi.nlm.nih.gov/pubmed/15085123>.  
Small, C M et al. 2017. "Host Genotype and Microbiota Contribute Asymmetrically to Transcriptional Variation in the Threespine Stickleback Gut." *Genome Biol Evol* 9(3): 504–20. <https://www.ncbi.nlm.nih.gov/pubmed/28391321>.  
Stuart, Tim et al. 2019. "Comprehensive Integration of Single-Cell Data." *Cell* 177(7): 1888–1902.e21.  
Tardaguila, Manuel et al. 2018. "SQANTI: Extensive Characterization of Long-Read Transcript Sequences for Quality Control in Full-Length Transcriptome Identification and Quantification." *Genome Research* 28(3): 396. /pmc/articles/PMC5848618/ (September 15, 2021).  
Tseng, Elizabeth. 2021. "CDNA Cupcake." [https://github.com/Magdoll/cDNA\\_Cupcake](https://github.com/Magdoll/cDNA_Cupcake).  
Wagner, Daniel E. et al. 2018. "Single-Cell Mapping of Gene Expression Landscapes and Lineage in the Zebrafish Embryo." *Science* 360(6392): 981–87.  
Wang, Yanshu, Hao Chang, Amir Rattner, and Jeremy Nathans. 2016. "Frizzled Receptors in Development and Disease." *Current topics in developmental biology* 117: 113.  
/pmc/articles/PMC5103317/ (September 15, 2021).  
Zheng, Ying-Feng et al. 2020. "HIT-SciSOseq: High-Throughput and High-Accuracy Single-Cell Full-Length Isoform Sequencing for Corneal Epithelium." *bioRxiv*: 2020.07.27.222349.  
<https://www.biorxiv.org/content/10.1101/2020.07.27.222349v1> (September 15, 2021).
